# Supplementary material for: Ancestry deconvolution and partial polygenic score can improve susceptibility predictions in recently admixed individuals
Source: PubMed Central journal article supplement (PMC7118071; doi:10.1038/s41467-020-15464-w), 2020-04-02
Supplement: 41467_2020_15464_MOESM2_ESM.pdf [file 41467_2020_15464_MOESM2_ESM.pdf]

**Title:** Supplementary Data 1

**Description:** This table reports the sample sizes for all distributions shown in Figure 2,4 and Supplementary Figure 5. Here we report also exact pvalues from Wilcoxon signed-rank test, together with side of the test and wilcoxon statistic, for each aspPS distribution shown in the figures above.
